# Supplementary material for: Toll-like receptor signaling in thymic epithelium controls monocyte-derived dendritic cell recruitment and Treg generation
Source: PubMed Central journal article supplement (PMC7217920; doi:10.1038/s41467-020-16081-3), 2020-05-12
Supplement: 41467_2020_16081_MOESM1_ESM.pdf [file 41467_2020_16081_MOESM1_ESM.pdf]

## **Supplementary information**

### **Toll-like receptor signaling in thymic epithelium controls monocyte-derived dendritic cell recruitment and Treg generation**

Matouš Vobořil, Tomáš Brabec, Jan Dobeš, Iva Šplíchalová, Jiří Březin, Adéla Čepková, Martina Dobešová, Aigerim Aidarova, Jan Kubovčiak, Oksana Tsyklauri, Ondřej Štěpánek, Vladimír Beneš, Radislav Sedláček, Ludger Klein, Michal Kolář and Dominik Filipp

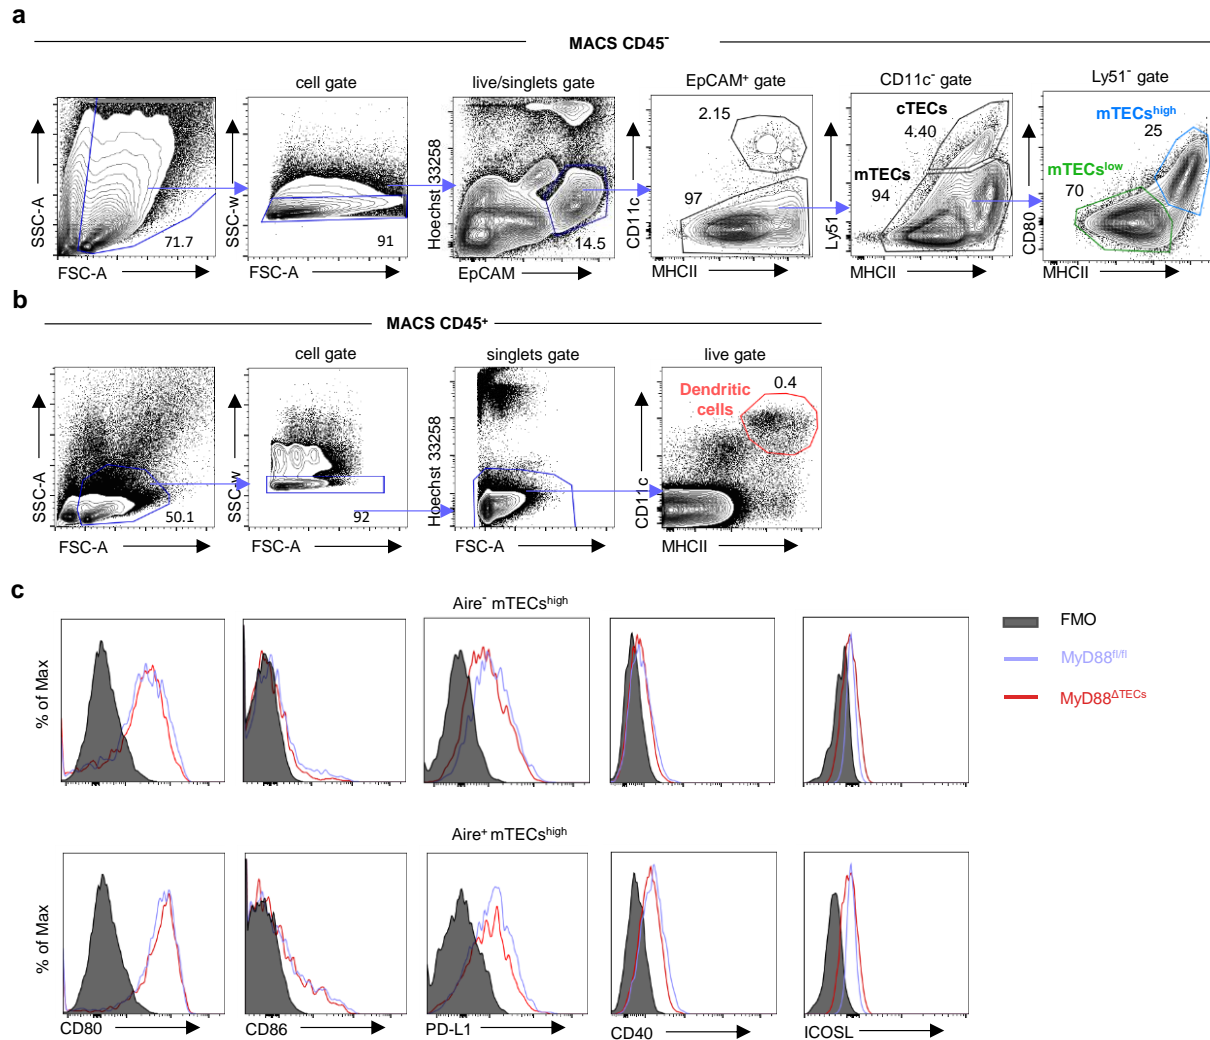

**Supplementary Fig. 1, Related to Fig. 1 | Gating strategies and MyD88 independent expression of co-stimulatory molecules by mTECs. a, b** Complete gating strategies of TECs and thymic classical DCs related to Fig. 1a. Thymic cell fraction were MACS depleted according to the expression of CD45. CD45<sup>-</sup> fraction was sequentially gated according to FSC-A and SSC-A, singlets, live EpCAM<sup>+</sup> and CD11c<sup>-</sup> cells. The EpCAM<sup>+</sup>CD11c<sup>-</sup> fraction representing TECs was then gated as cTECs (Ly51<sup>+</sup>) and mTECs (Ly51<sup>-</sup>). mTECs consist of two major populations: mTECs<sup>low</sup> (MHCII<sup>low</sup>CD80<sup>low</sup>) and mTECs<sup>high</sup> (MHCII<sup>high</sup>CD80<sup>high</sup>). CD45<sup>+</sup> fraction was gated according to the FSC-A, SSC-A, SSC-W and Hoechst 33258 to live, single cells. Thymic conventional DCs were gated as MHCII<sup>+</sup>CD11c<sup>high</sup>. **c** Representative flow cytometry histograms of co-stimulatory molecules (CD80, CD86, PD-L1, CD40 and ICOSL) expression on Aire<sup>-</sup> mTECs<sup>high</sup> and Aire<sup>+</sup> mTECs<sup>high</sup> of MyD88<sup>fl/fl</sup> and MyD88<sup>ΔTECs</sup> mice, *n*=2 independent experiments.

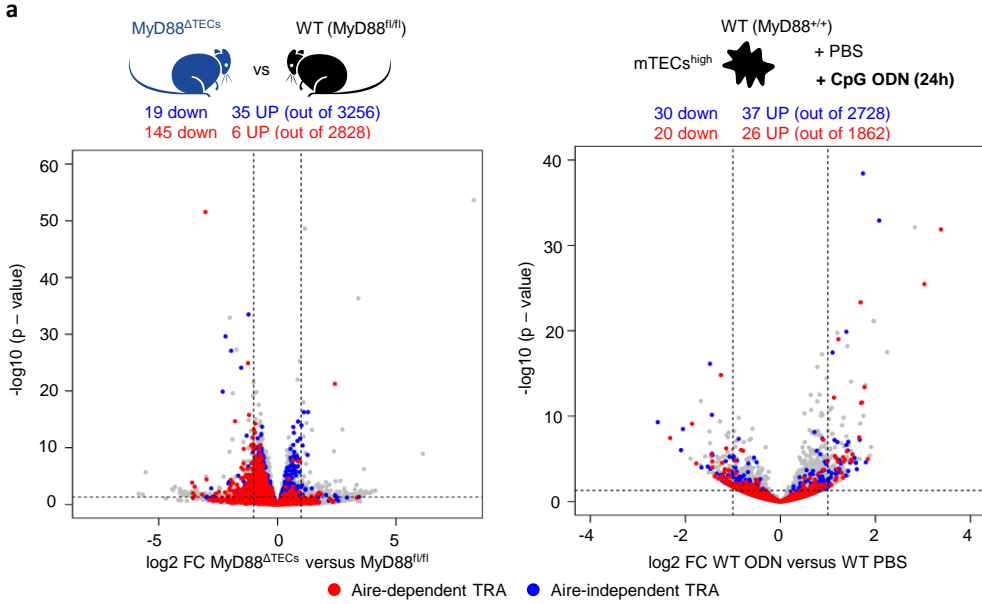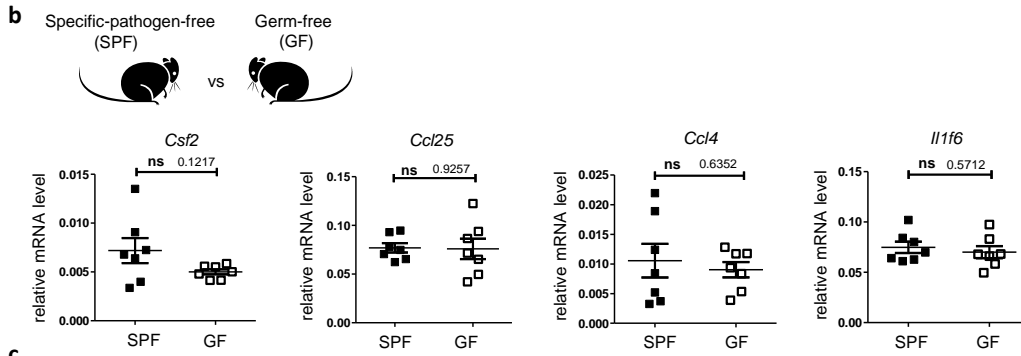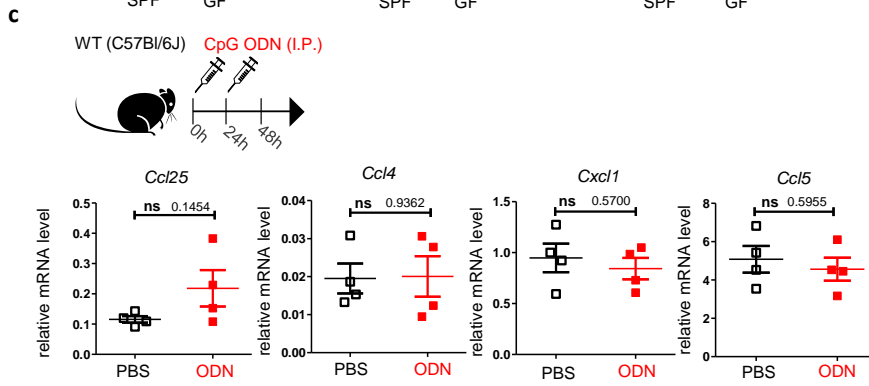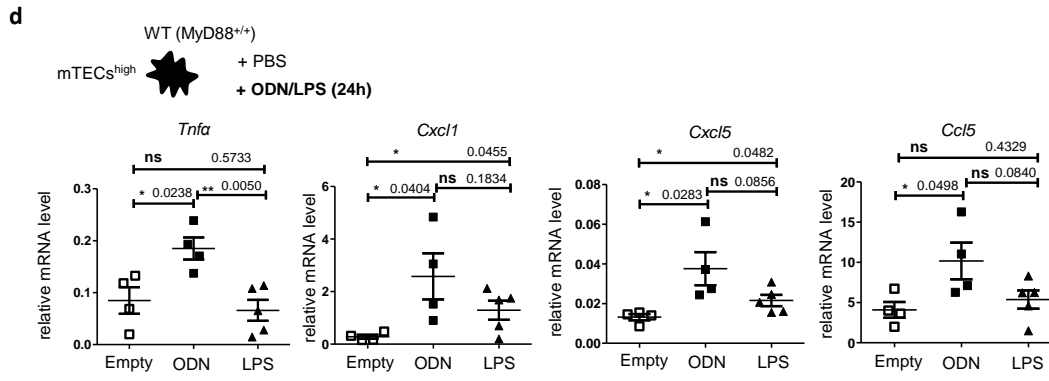

**Supplementary Fig. 2, Related to Fig. 2 | TLR/MyD88 signaling in mTECs<sup>high</sup> drives the expression of cytokines and chemokine independently on presence of microbiota.** **a** Volcano plot analysis of RNA-sequencing data from Fig. 2b (left plot) and 2e (right plot) showing comparison of Aire-dependent (red) and Aire-independent (blue) TRA genes, non TRA genes are in grey. Statistical analysis was performed by Wald test, Fold-change cutoff of  $\log_2 = \pm 1,0$  and p-value: 0,05 are marked by dashed lines ( $n=5$  samples for left plot and  $n=4$  samples for right plot). **b** qRT-PCR analysis of mRNA expression (normalized to Cacs3) of genes selected based on the Fig. 2b from mTEC<sup>high</sup> isolated from Specific-pathogen-free (SPF) or Germ-free (GF) WT (C57Bl/6J) mice (mean  $\pm$  SEM,  $n=7$  mice). **c** qRT-PCR analysis of mRNA expression (normalized to Cacs3) of genes selected based on the Fig. 2b and e from intraperitoneally CpG ODN stimulated WT (C57Bl/6J) mice (mean  $\pm$  SEM,  $n=4$  mice). **d** qRT-PCR analysis of mRNA expression (normalized to Cacs3) of genes selected based on the Fig. 2e from *in vitro* CpG ODN or LPS stimulated mTECs<sup>high</sup> (mean  $\pm$  SEM,  $n=4$  for Empty and ODN and  $n=5$  for LPS stimulated samples). Statistical analysis in b, c and d was performed by unpaired, two-tailed Student's t-test,  $p \leq 0.05 = *$ ,  $p \leq 0.01 = **$ , ns = not significant.

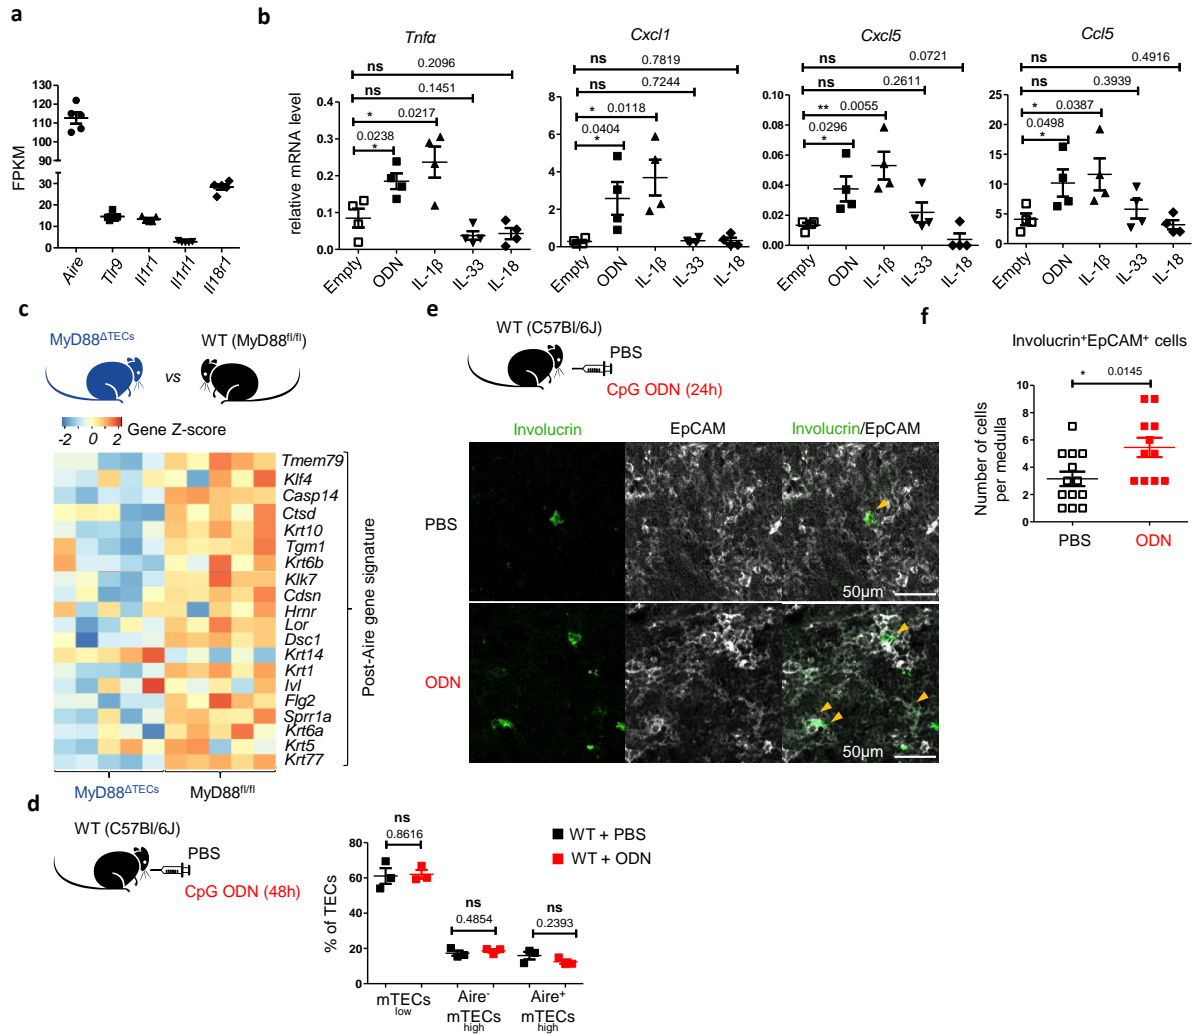

**Supplementary Fig. 3, Related to Fig. 2 | TLR/MyD88 signaling affects the development of post-Aire mTECs.** **a** Expression of indicated genes in mTECs<sup>high</sup> depicted as FPKM (Fragments normalized per kilobase of feature length per million mapped fragments) (mean  $\pm$  SEM,  $n=5$  samples). **b** qRT-PCR analysis of mRNA expression (normalized to *Cac3*) of genes selected based on the Fig. 2e from *in vitro* CpG ODN, IL-1 $\beta$ , IL-33 and IL-18 stimulated mTECs<sup>high</sup> (mean  $\pm$  SEM,  $n=4$  samples). **c** Comparison of the expression of signature genes associated with post-Aire mTECs between MyD88 $\Delta$ TECs and MyD88<sup>fl/fl</sup> mice. Data are derived from RNAseq analysis shown in Fig. 2b. **d** The frequencies of mTECs (gated as in Fig. 1e) isolated from CpG ODN or PBS intrathymically stimulated WT (C57Bl/6J) mice and analyzed by flow cytometry (mean  $\pm$  SEM,  $n=3$  mice). **e** Microscopic examinations of thymic sections isolated from CpG ODN or PBS intrathymically stimulated WT (C57Bl/6J) mice. Cryosections were stained with Involucrin (green) and EpCAM (white). Scale bar represents 50 $\mu$ m. **f** Enumeration of Involucrin<sup>+</sup>EpCAM<sup>+</sup> cells in the medullar region of the cryosections shown in e (mean  $\pm$  SEM,  $n=11$  for ODN and  $n=13$  for PBS stimulated medullary regions from 3 independent experiments). Statistical analysis in b, d and f was performed by unpaired, two-tailed Student's t-test,  $p \leq 0.05 = *$ ,  $p \leq 0.01 = **$ , ns = not significant.

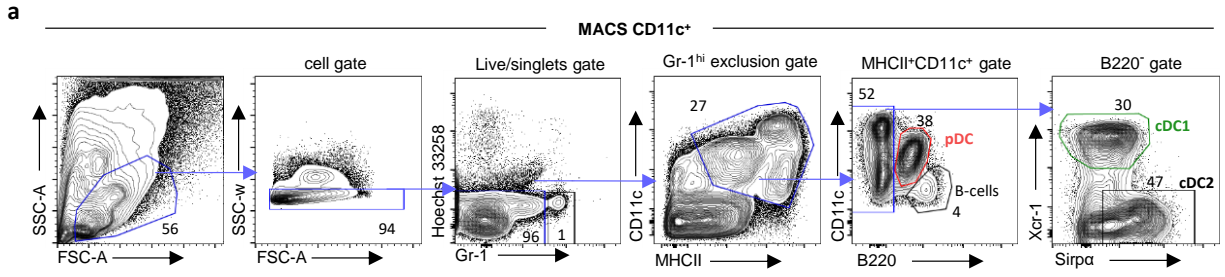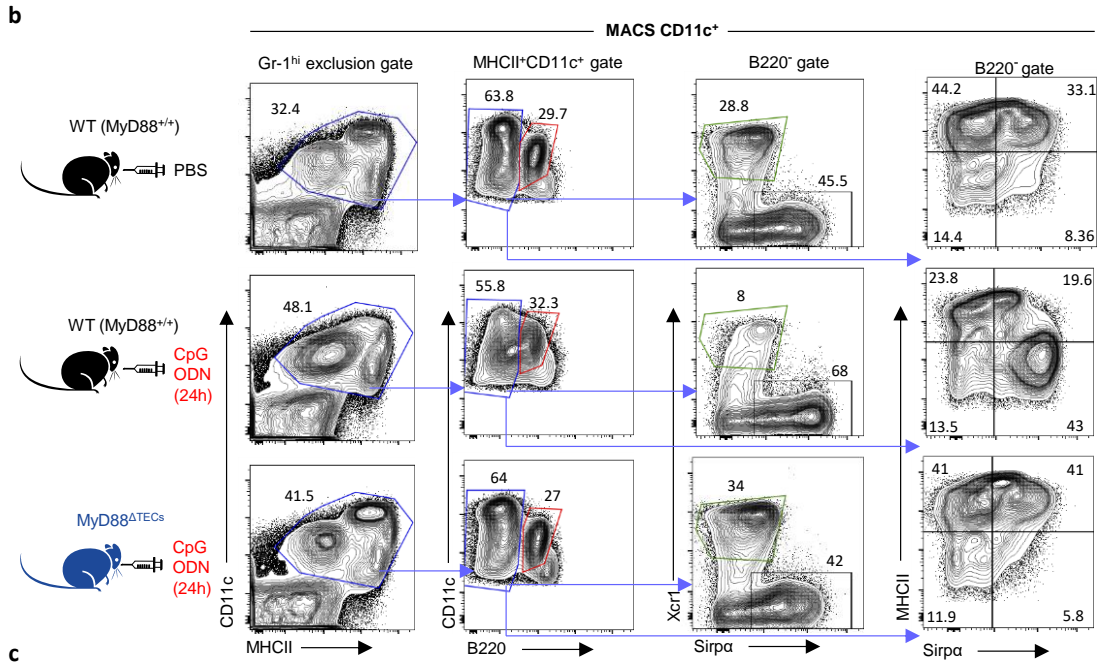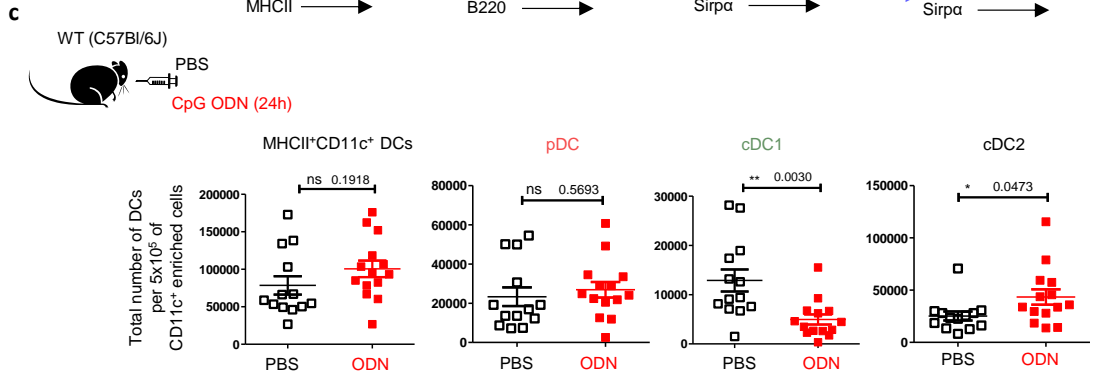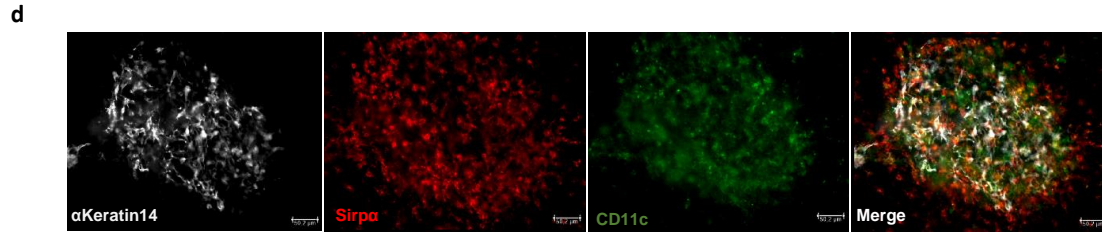

**Supplementary Fig. 4, Related to Fig. 3 | Representative gating strategies and localization of thymic DCs.** **a** Complete gating strategy of thymic DCs subpopulations. Thymic cells were MACS enriched for CD11c<sup>+</sup> cells and sequentially gated according to FSC-A and SSC-A, singlets and live cells. Total thymic DCs were gated as Gr-1<sup>-</sup>CD11c<sup>+</sup>MHCII<sup>+</sup>. Thymic DCs were then divided into three major populations; pDC = CD11c<sup>low</sup>MHCII<sup>low</sup>B220<sup>+</sup>, cDC1 = CD11c<sup>+</sup>MHCII<sup>+</sup>B220<sup>-</sup>Xcr1<sup>+</sup>Sirpα<sup>-</sup> and cDC2 = CD11c<sup>+</sup>MHCII<sup>+</sup>B220<sup>-</sup>Xcr1<sup>-</sup>Sirpα<sup>+</sup>. **b** Representative flow cytometry plots showing frequency of thymic DC subpopulations in CpG ODN or PBS intrathymically stimulated MyD88<sup>fl/fl</sup> or MyD88<sup>ΔTECs</sup> mice. **c** Quantification of the total number of thymic DCs, isolated as CD11c<sup>+</sup> MACS enriched population from CpG ODN or PBS intrathymically stimulated WT (C57Bl/6J) mice (mean ± SEM, *n*=13 for PBS and *n*=14 for ODN stimulated mice). Statistical analysis was performed by unpaired, two-tailed Student's t-test, *p* ≤ 0.05 = \*, *p* ≤ 0.01 = \*\*, ns = not significant. **d** Microscopic analysis of the localization of Sirpα<sup>+</sup>mDCs in WT (C57Bl/6J) thymic medullary region determined by Keratin-14 staining. Scale bar represents 50.2 μm (*n*=3 independent experiments).

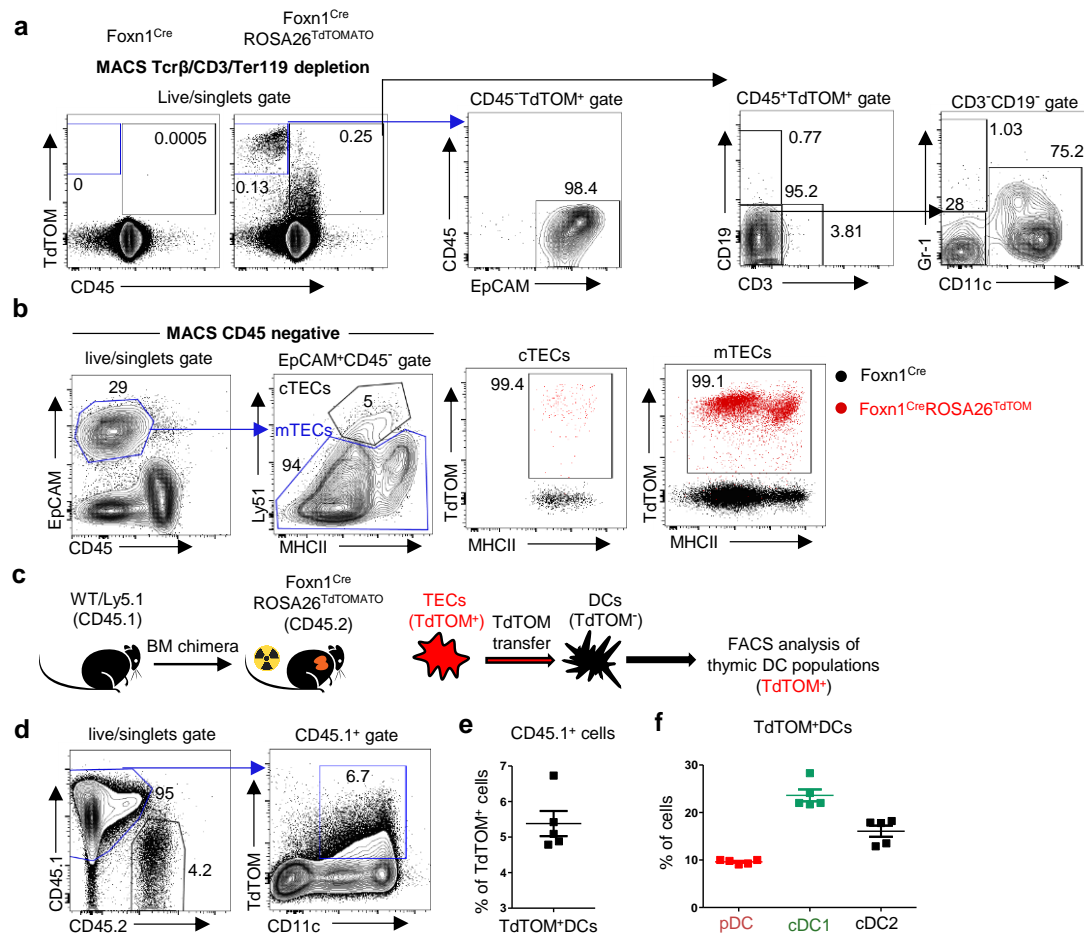

**Supplementary Fig. 5, Related to Fig. 4 | Foxn1<sup>Cre</sup>ROSA26<sup>TdTOMATO</sup> as a model of thymic cooperative antigen transfer.** **a** Representative flow cytometry plots showing frequency of TdTOM<sup>+</sup> cells among MACS TCR $\beta$ , CD3 and Ter119 depleted thymic cells from WT (Foxn1<sup>Cre</sup>) and Foxn1<sup>Cre</sup>ROSA26<sup>TdTOMATO</sup> mice ( $n=3$  independent experiments). CD45<sup>+</sup>TdTOM<sup>+</sup> cells were further divided by CD19, CD3, Gr-1 and CD11c protein staining. **b** Flow cytometry analysis of TdTOM expression in CD45<sup>-</sup> depleted and EpCAM<sup>+</sup> thymic epithelial populations. The level of TdTOM is projected as an overlay of gated subset (cTECs or mTECs, right panels) from Foxn1<sup>Cre</sup> (black dots) and Foxn1<sup>Cre</sup>ROSA26<sup>TdTOMATO</sup> (red dots) mice ( $n=3$  independent experiments). The number indicates the percentage of TdTOM<sup>+</sup> cells from gated subset. **c** Design of experiment. **d** Representative flow cytometry plots showing the frequency of TdTOM<sup>+</sup>CD11c<sup>+</sup> cells in the thymic MACS-enriched CD11c donor cells from WT (CD45.1<sup>+</sup>) to Foxn1<sup>Cre</sup>ROSA26<sup>TdTOMATO</sup> BM chimeras. **e** Quantification of the frequencies of CD45.1<sup>+</sup>TdTOM<sup>+</sup> DCs (mean  $\pm$  SEM,  $n=5$  mice). **f** Quantification of frequencies of CD45.1<sup>+</sup>TdTOM<sup>+</sup> DCs among DC subsets (gated as in Supplementary Fig. 3a) (mean  $\pm$  SEM,  $n=5$  mice).



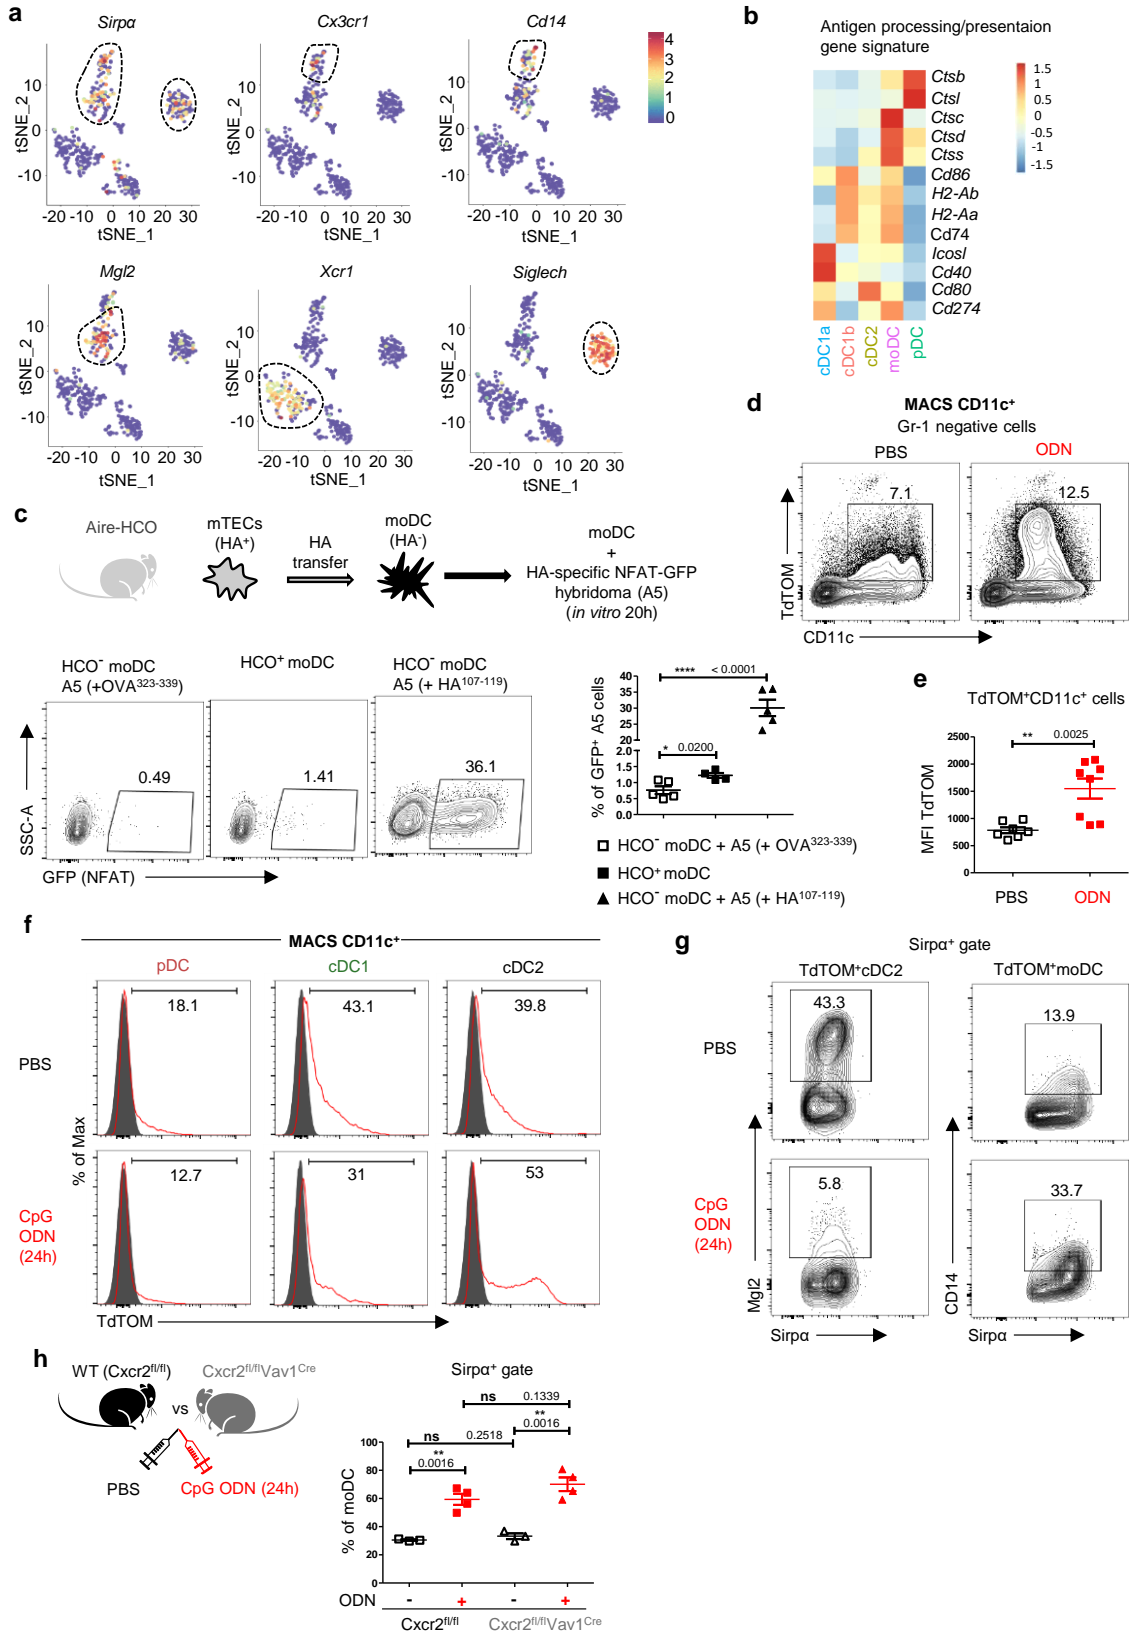

**Supplementary Fig. 6, Related to Fig. 5 | TLR/MyD88 signaling increases cooperative antigen transfer between TECs and CD14<sup>+</sup> moDC subpopulation.** **a** Heat-map projection of selected signature genes (based on the Fig. 5a) between individual clusters (dashed circles) onto the two-dimensional tSNE plot. **b** Heat-map analysis of the expression of antigen processing/presentation signature genes in each subset defined in Fig. 5a. **c** Indirect presentation of Influenza Haemagglutinin (HA) by CD14<sup>+</sup>moDC (sorted as CD11c<sup>+</sup>MHCII<sup>+</sup>B220<sup>-</sup>Xcr1<sup>-</sup>Cx3cr1<sup>+</sup>CD14<sup>+</sup>) using Aire-HCO mice model and A5 hybridoma T-cell line. Representative flow cytometry plots showing frequency of GFP<sup>+</sup> A5 cells co-cultivates with moDCs sorted from Aire-HCO<sup>-</sup> (pulsed with irrelevant OVA peptide, left plot), Aire-HCO<sup>+</sup> mice (middle plot) and Aire-HCO<sup>-</sup> (pulsed with HA peptide, right plot). The graph shows the quantification of frequency of GFP<sup>+</sup> A5 cells (mean ± SEM, *n*=4 for HCO<sup>+</sup>moDC and *n*=5 for HCO<sup>-</sup>moDC + A5 independent experiments). **d** Representative flow cytometry plots comparing the frequency of Gr-1<sup>-</sup>TdTOM<sup>+</sup>CD11c<sup>+</sup> cells between CpG ODN and PBS intrathymically stimulated Foxn1<sup>Cre</sup>ROSA26<sup>TdTOMATO</sup> mice. **e** Quantification of TdTOMATO Mean fluorescent intensity (MFI) in mice described in d (mean ± SEM, *n*=7 for PBS and *n*=8 for ODN mice). **f** Representative flow cytometry plots showing frequency of TdTOM<sup>+</sup> cells among pDCs, cDC1 and cDC2 (gated as in Supplementary Fig. 4a) in mice described in Fig. 5d. Grey histograms represent control Foxn1<sup>Cre</sup> mice. **g** Representative flow cytometry plots showing frequency of Mgl2<sup>+</sup>cDC2 or CD14<sup>+</sup>moDC cells among TdTOM<sup>+</sup>Sirpα<sup>+</sup> DCs in CpG ODN or PBS intrathymically stimulated Foxn1<sup>Cre</sup>ROSA26<sup>TdTOMATO</sup> mice. **h** Quantification of frequencies of TdTOM<sup>+</sup>CD14<sup>+</sup> moDC from CpG ODN or PBS intrathymically stimulated Cxcr2<sup>fl/fl</sup> or Cxcr2<sup>fl/fl</sup>Vav1Cre mice (mean ± SEM, *n*=3 for ODN<sup>-</sup> and *n*=4 for ODN<sup>+</sup> mice). Statistical analysis in c, e and h was performed by unpaired, two-tailed Student's t-test, *p* ≤ 0.05 = \*, *p* ≤ 0.01 = \*\*, *p* < 0.0001 = \*\*\*\*, ns = not significant.

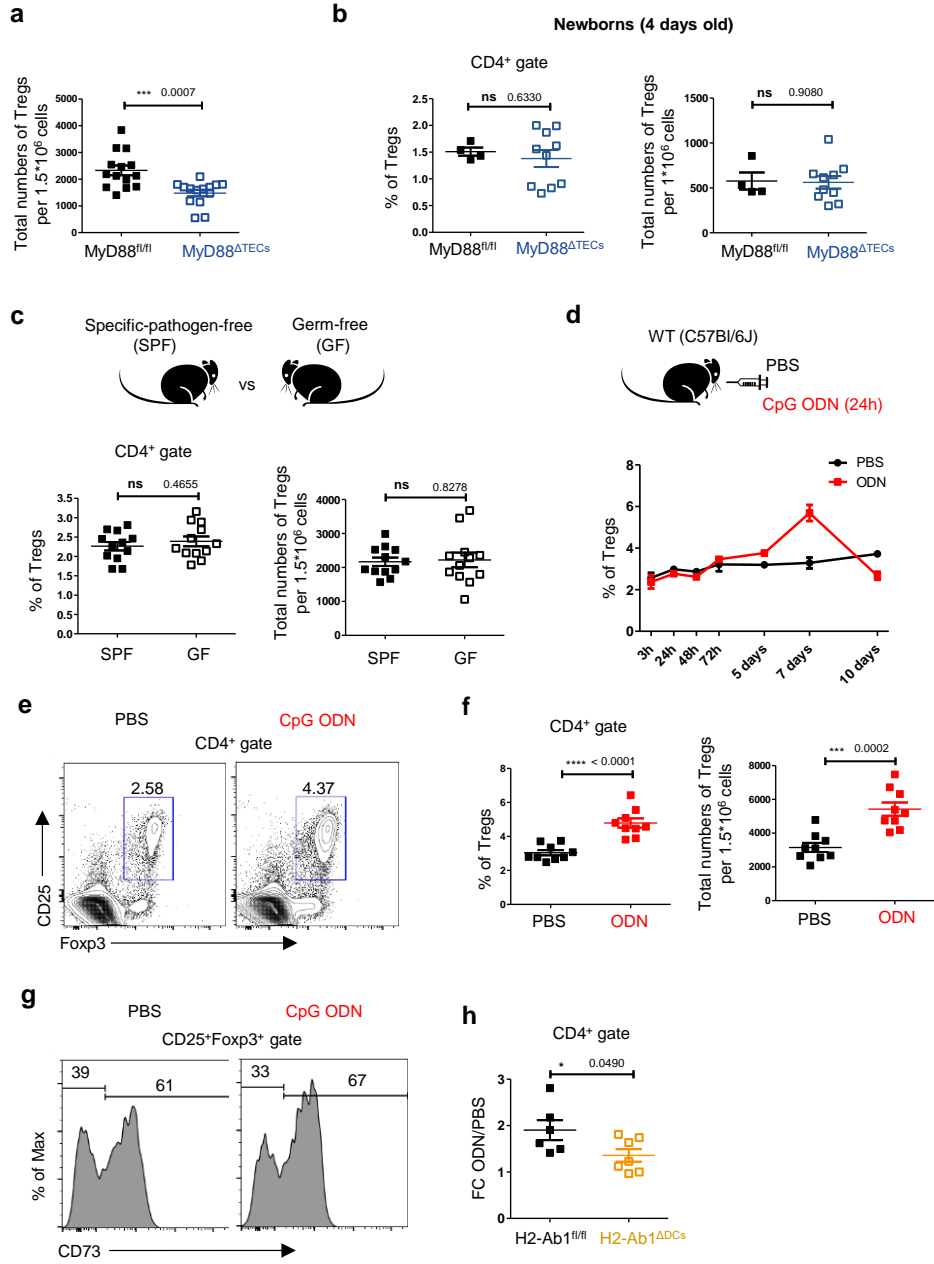

**Supplementary Fig. 7, Related to Fig. 6 | Development of CD25<sup>+</sup>Foxp3<sup>+</sup> thymic Tregs is impaired in the absence of TLR/MyD88 signaling in TECs.** **a** Quantification of the total number of CD4<sup>+</sup>CD25<sup>+</sup>Foxp3<sup>+</sup> thymic Tregs in MyD88<sup>fl/fl</sup> and MyD88<sup>ΔTECs</sup> (mean ± SEM, *n*=14 mice). **b** Quantification of frequencies (left graph) and total numbers (right plot) of CD4<sup>+</sup>CD25<sup>+</sup>Foxp3<sup>+</sup> thymic Tregs isolated from the newborn (4 days old) MyD88<sup>fl/fl</sup> and MyD88<sup>ΔTECs</sup> mice (mean ± SEM, *n*=4 for MyD88<sup>fl/fl</sup> and *n*=10 for MyD88<sup>ΔTECs</sup> mice). **c** Quantification of frequencies (left graph) and total numbers (right plot) of CD4<sup>+</sup>CD25<sup>+</sup>Foxp3<sup>+</sup> thymic Tregs in Specific-pathogen-free (SPF) and Germ-free (GF) WT (C57Bl/6J) mice (mean ± SEM, *n*=12 mice). **d** Quantification of the frequencies of CD4<sup>+</sup>CD25<sup>+</sup>Foxp3<sup>+</sup> thymic Tregs from CpG ODN or PBS intrathymically stimulated WT (C57Bl/6J) mice over the indicated period of time, from 3 hours to 10 days (mean ± SEM, *n*=2 for 48h, 72h and 10days PBS and 10days ODN and *n*=3 for other displayed items). **e** Representative flow cytometry plots comparing frequencies of CD4<sup>+</sup>CD25<sup>+</sup>Foxp3<sup>+</sup> thymic Tregs in CpG ODN or PBS intrathymically stimulated WT (C57Bl/6J) mice 7 days after stimulation. **f** Quantification of frequencies and the total numbers of thymic Tregs from mice described in e, (mean ± SEM, *n*=9 mice). **g** Representative flow cytometry histograms showing the expression of CD73 by CD4<sup>+</sup>CD25<sup>+</sup>Foxp3<sup>+</sup> thymic Tregs in CpG ODN or PBS intrathymically stimulated WT (C57Bl/6J) mice. **h** Fold-change increase in the cellularity of thymic Tregs in H2-Ab1<sup>fl/fl</sup> and H2-Ab1<sup>ΔDCs</sup> mice stimulated with CpG ODN (mean ± SEM, *n*=6 for H2-Ab1<sup>fl/fl</sup> and *n*=7 for H2-Ab1<sup>ΔDCs</sup> mice). Data were calculated from Fig. 6h. Statistical analysis in a, b, c, f and h was performed by unpaired, two-tailed Student's t-test, *p* ≤ 0.05 = \*, *p* ≤ 0.001 = \*\*\*, *p* < 0.0001 = \*\*\*\*, ns = not significant.

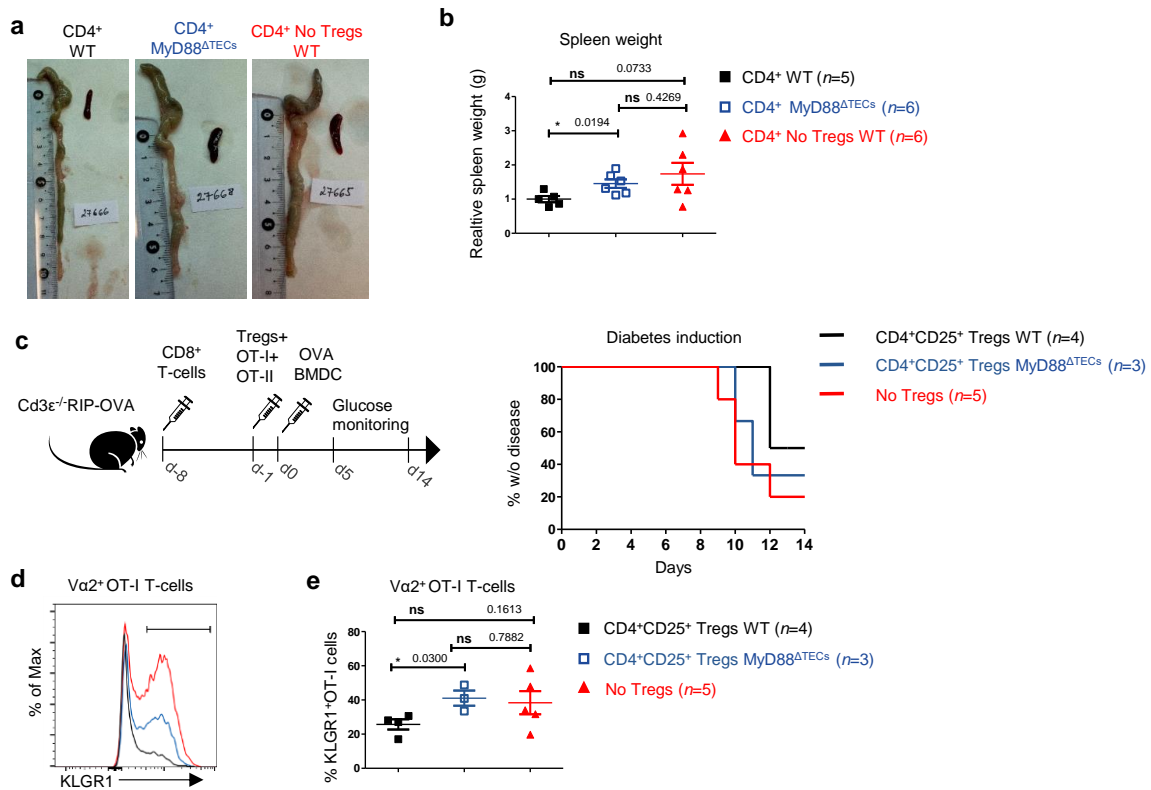

**Supplementary Fig. 8, Related to Fig. 7 | Tregs cells from MyD88<sup>ΔTECs</sup> mice have reduced suppressive capacity and failed to prevent the development of T-cell induced colitis or diabetes.** **a** Representative pictures showing the size of colon and spleen from indicated mice (described in Figure 7a). **b** Relative quantification (normalized to average of control mice from each experiment) of spleen weight of T-cell induced colitis experimental mice (mean ± SEM, *n*=5-6 mice). Statistical analysis was performed by unpaired, two-tailed Student's t-test, *p* ≤ 0.05 = \*, ns = not significant. **c** Design of experiment and disease progression curve showing the percentage of non-diabetic mice. Number of *n* for each cohort is indicated. **d** Representative flow cytometry histograms of KLGR1 expression in Va2<sup>+</sup>OT-I T-cells isolated at day 14 from spleen of mice from c. **e** Quantification of frequencies of KLGR1<sup>+</sup>OT-I T-cells from d (mean ± SEM, *n*=3-5 mice). Statistical analysis was performed by unpaired, two-tailed Student's t-test, *p* ≤ 0.05 = \*, ns = not significant.
